# Supplementary material for: Wolfram Syndrome protein, Miner1, regulates sulphydryl redox status, the unfolded protein response, and Ca2+ homeostasis
Source: PubMed Central journal article supplement (PMC3779451; doi:10.1002/emmm.201201429), 2013-05-24

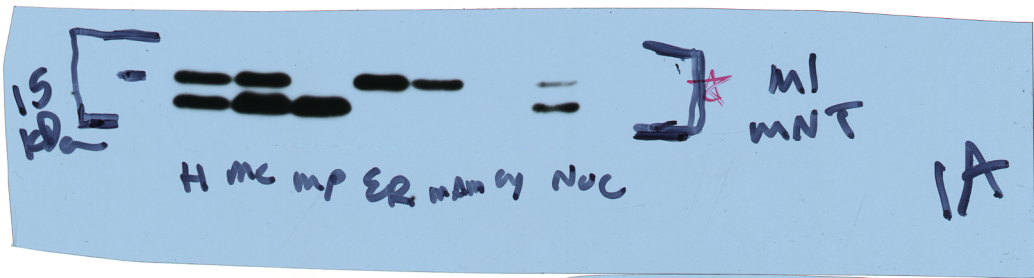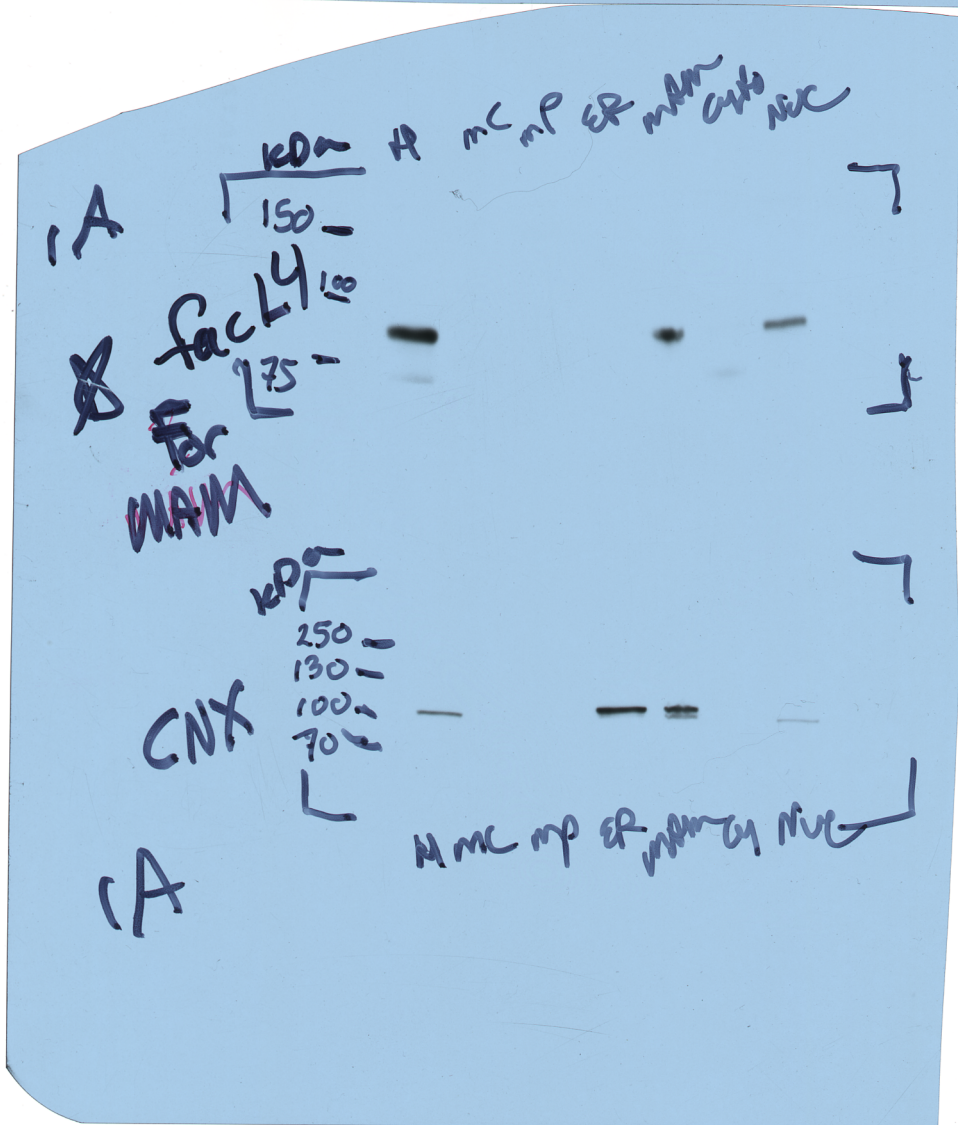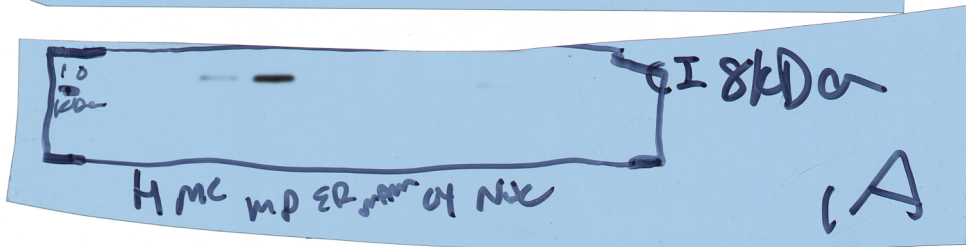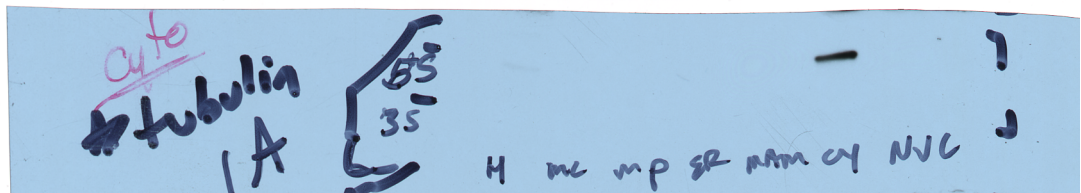

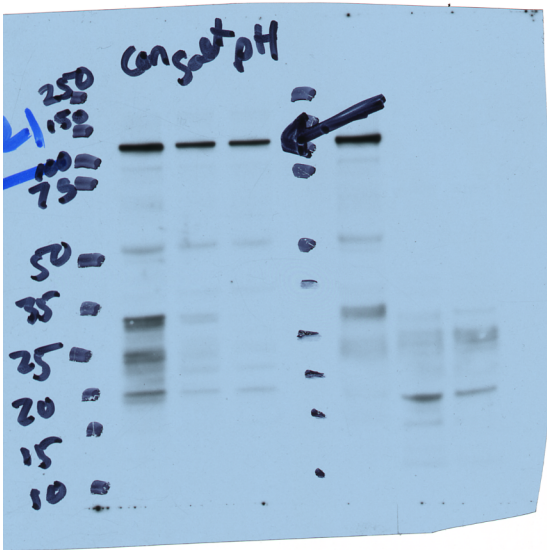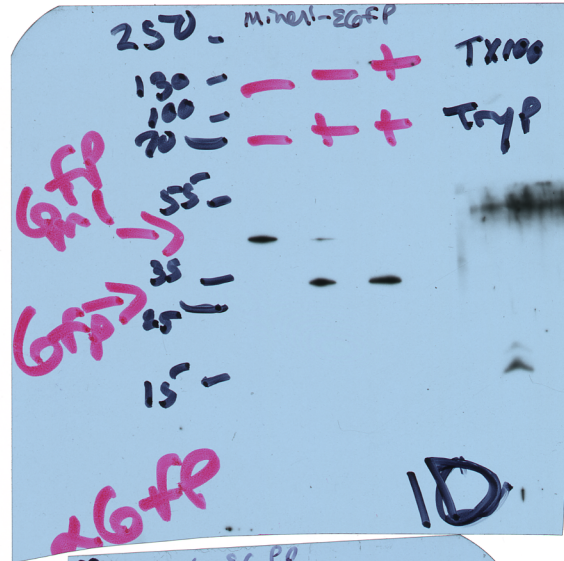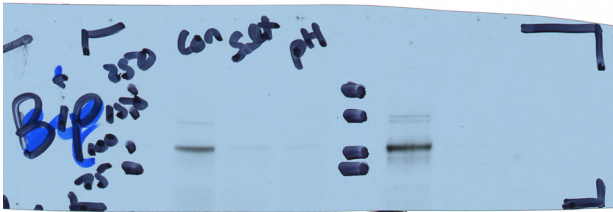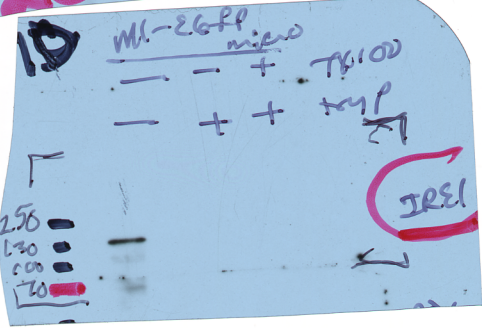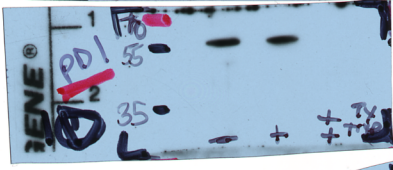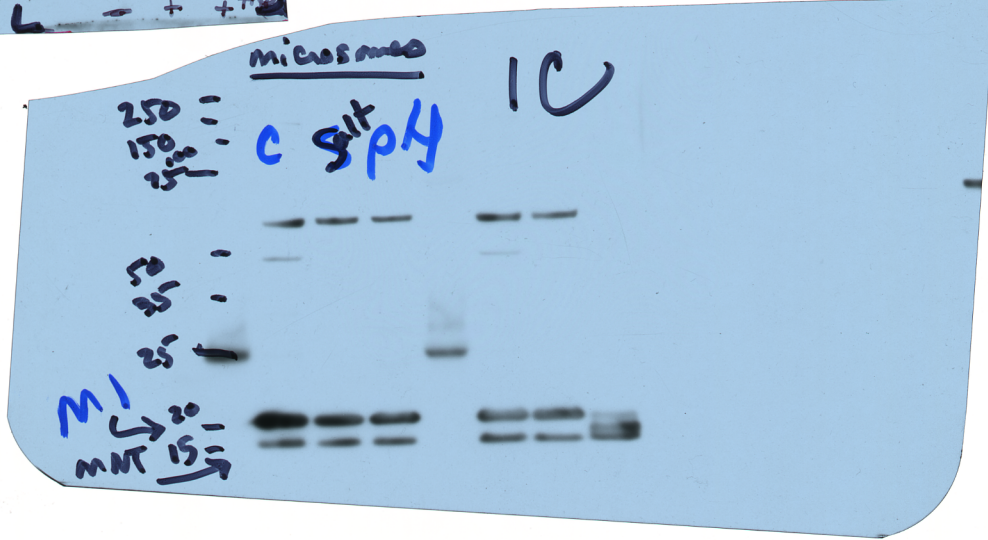

Supplement: emmm0005-0904-SD2.pdf [file emmm0005-0904-SD2.pdf]
